# Supplementary material
Source: publisher figshare collection journal article supplement (https://asha.figshare.com/ndownloader/files/15738923)
Supplement: Supplementary file 1 [file 15738923]

## Supplemental Material S12. AFC-list columns: Names and descriptions.

This document describes the column names used in the AFC-list. For each column, a brief description of its content is given.

| AFC-list column heading  | Description                                                                                                |
|--------------------------|------------------------------------------------------------------------------------------------------------|
| OrthographicForm         | The orthographic form                                                                                      |
| GIL2P_OT_Average         | The average grapheme-initial letter-to-pronunciation orthographic transparency                             |
| GIL2P_OT_Min             | The minimum grapheme-initial letter-to-pronunciation orthographic transparency                             |
| PIP2G_OT_Average         | The average pronunciation-initial phone-to-grapheme orthographic transparency                              |
| PIP2G_OT_Min             | The minimum pronunciation-initial phone-to-grapheme orthographic transparency                              |
| G2P_OT_Average           | The average grapheme-to-pronunciation orthographic transparency                                            |
| UpperCase                | The proportion of times the word begins with an upper case letter                                          |
| Homographs               | The reduced phonetic transcriptions of homographs                                                          |
| HomographCount           | The number of homographs                                                                                   |
| SpecialCharacter         | The existence of special characters in the orthographic form                                               |
| RawWordTypeFrequency     | The total number of occurrences of the spelling in the internet blog corpora.                              |
| RawDocumentCount         | The total number of different internet blogs in which the word occurs, based on the internet blog corpora. |
| PhoneticForm             | The standard phonetic transcription, according to the convention described in the present article.         |
| TemporarySyllabification | The phonetic transcription re-syllabified by the syllabification tool used when calculating SSPP.          |
| ReducedTranscription     | The reduced phonetic transcription                                                                         |
| PhonotacticType          | The phonotactic type                                                                                       |
| SSPP_Average             | The average normalized stress and syllable based phonotactic probability                                   |
| SSPP_Min                 | The minimum normalized stress and syllable based phonotactic probability                                   |
| PSP_Sum                  | The summed positional segment probability                                                                  |
| PSBP_Sum                 | The summed position specific bi-phone probability                                                          |
| S_PSP_Average            | The average standardized positional segment probability                                                    |
| S_PSBP_Average           | The average standardized position specific bi-phone probability                                            |

|                         |                                                                                                                                                                                                                 |
|-------------------------|-----------------------------------------------------------------------------------------------------------------------------------------------------------------------------------------------------------------|
| Homophones              | All homophone spellings                                                                                                                                                                                         |
| HomophoneCount          | The number of homophones                                                                                                                                                                                        |
| PNDP                    | The Zipf-scale weighted phonetic neighborhood density probability                                                                                                                                               |
| PLD1Transcriptions      | The reduced phonetic transcriptions and raw word frequencies (delimited by colons) of phonetic neighbors (delimited by vertical lines), sorted according to word frequency. The first word is the look-up word. |
| ONDP                    | The Zipf-scale weighted orthographic neighborhood density probability                                                                                                                                           |
| OLD1Spellings           | The orthographic forms and raw word frequencies (delimited by commas) of orthographic neighbors (delimited by vertical lines), sorted according to word frequency. The first word is the look-up word.          |
| Sonographs              | The sonographs                                                                                                                                                                                                  |
| AllPoS                  | The word-class assignments, and their relative distributions in the internet blog corpora.                                                                                                                      |
| AllLemmas               | The lemma assignments, and their relative distributions in the internet blog corpora.                                                                                                                           |
| NumberOfSenses          | The total number of senses of all lemmas                                                                                                                                                                        |
| Abbreviation            | The abbreviation marking                                                                                                                                                                                        |
| Acronym                 | The acronym marking                                                                                                                                                                                             |
| ForeignWord             | The foreign word marking                                                                                                                                                                                        |
| ZipfValue               | The Zipf-scale value                                                                                                                                                                                            |
| LetterCount             | The number of letters in the orthographic form                                                                                                                                                                  |
| GraphemeCount           | The number of graphemes in the sonograph array                                                                                                                                                                  |
| DiGraphCount            | The number of two-letter graphemes in the sonograph array                                                                                                                                                       |
| TriGraphCount           | The number of three-letter graphemes in the sonograph array                                                                                                                                                     |
| LongGraphemesCount      | The number of graphemes longer than three letters in the sonograph array                                                                                                                                        |
| SyllableCount           | The number of syllables in the phonetic transcription                                                                                                                                                           |
| Tone                    | The pitch accent                                                                                                                                                                                                |
| MainStressSyllable      | The primary stressed syllable (1-based index)                                                                                                                                                                   |
| SecondaryStressSyllable | The secondary stressed syllable (1-based index)                                                                                                                                                                 |
| PhoneCount              | The number of phonetic segments in the phonetic transcription                                                                                                                                                   |
| PLD1WordCount           | The number of phonetic neighbors                                                                                                                                                                                |
| OLD1WordCount           | The number of orthographic neighbors                                                                                                                                                                            |
| PossiblePoSCount        | The number of possible word classes                                                                                                                                                                             |
| PossibleLemmaCount      | The number of possible lemmas                                                                                                                                                                                   |

---
